# Supplementary material
Source: Springer Nature journal article supplement (https://www.springermedizin.de/resource/supplementary/13063_2008_301_MOESM4_ESM.pdf/9617942)
Supplement: MOESM4 [file 9617942]

Randomize 8 primary care practices

```
graph TD; A[Randomize 8 primary care practices] --> B[4 Control practices]; A --> C[4 Intervention practices]; B --> D[16 MD control]; C --> E[16 MD intervention]; D --> F[Patient control N = 141]; D --> G[Patient intervention N = 140]; E --> H[Patient control N = 148]; E --> I[Patient intervention N = 145];
```

4 Control practices

4 Intervention practices

16 MD control

16 MD intervention

Patient  
control  
N = 141

Patient  
intervention  
N = 140

Patient  
control  
N = 148

Patient  
intervention  
N = 145
